# Supplementary material for: The highly exothermic hydrogen abstraction reaction H2Te + OH → H2O + TeH: comparison with analogous reactions for H2Se and H2S
Source: Royal Society of Chemistry journal article supplement (doi:10.1039/d2cp05989d), 2023-01-01
Supplement: d2cp05989d1.pdf [file d2cp05989d1.pdf]

## The Highly Exothermic Hydrogen Abstraction Reaction

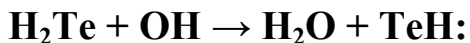

## Comparison with Analogous Reactions for H<sub>2</sub>Se and H<sub>2</sub>S

### Supporting Information

**Figure S1.** Profile of the CCSD(T) potential energy surface without zero-point vibrational energy (ZPVE) corrections for the H<sub>2</sub>Te + OH → H<sub>2</sub>O + TeH reaction. The 5Z results are single-point energies at the optimized QZ geometries (in kJ/mol).

**Figure S2.** Two possible pathways without ZPVE corrections for the H<sub>2</sub>Te + OH reaction. All energies are CCSD(T)/aug-cc-pV5Z-PP single point energies at the QZ optimized geometries (in kJ/mol).

**Figure S3.** Five stationary points on the potential energy surface for the H<sub>2</sub>Te + OH reaction. The single-point energies with 5Z at the optimized QZ geometries are corrected by ZPVE and spin-orbit coupling (SOC) effects (in kJ/mol).

**Figure S4.** Optimized geometries of the reactant complexes and the product complexes with two DFT (M06-2X and MPWB1K) functionals. All bond distances are in Å.

**Figure S5.** Comparison of the potential energy surface of the H<sub>2</sub>Te + OH reaction with the H<sub>2</sub>Se + OH,<sup>[2]</sup> H<sub>2</sub>S + OH,<sup>[3]</sup> and H<sub>2</sub>O + OH<sup>[4]</sup> reactions at the CCSD(T)/5Z level (with ZPVE corrections, in kJ/mol).

**Figure S6.** Comparison of the potential energy surface of the H<sub>2</sub>Te + OH reaction with the H<sub>2</sub>Se + OH,<sup>[2]</sup> H<sub>2</sub>S + OH,<sup>[3]</sup> and H<sub>2</sub>O + OH<sup>[4]</sup> reactions at the CCSD(T)/5Z level (without ZPVE corrections).

**Table S1.**  $T_1$  diagnostic values of all the stationary points for the two pathways of the  $\text{H}_2\text{Te} + \text{OH}$  reaction.

**Table S2.** Optimized geometries (Z-matrix) of the reactant (entrance) complex with the CCSD(T) method.

**Table S3.** Optimized geometries (Z-matrix) of the transition state **TS1** ( $^2\text{A}$ ) and **TS2** ( $^2\text{A}''$ ) with the CCSD(T) method.

**Table S4.** Optimized geometries (Z-matrix) of the product (exit) complex with the CCSD(T) method.

**Table S5.** Harmonic vibrational frequencies  $\omega$  ( $\text{cm}^{-1}$ ) and infrared intensities ( $\text{km/mol}$ , in parentheses) for the stationary points of the  $\text{H}_2\text{Te} + \text{OH}$  reaction from the CCSD(T) method with the aug-cc-pVnZ-PP ( $n = \text{D, T, Q}$ ) basis sets.

**Table S6.** Relative energies ( $\text{kcal/mol}$ ) of the stationary points for the  $\text{H}_2\text{Te} + \text{OH}$  reaction predicted by 28 DFT methods with the aug-cc-pVTZ-PP basis sets without ZPVE corrections.

**Table S7.** Predicted geometries for **TS1** by 28 DFT functionals with the aug-cc-pVTZ-PP basis sets.

**Table S8.** Barrier heights (in  $\text{kcal/mol}$ ) using the CCSD(T)/aug-cc-pVQZ-PP single-point energies at the geometries predicted by the 28 DFT methods with the aug-cc-pVTZ-PP basis sets.

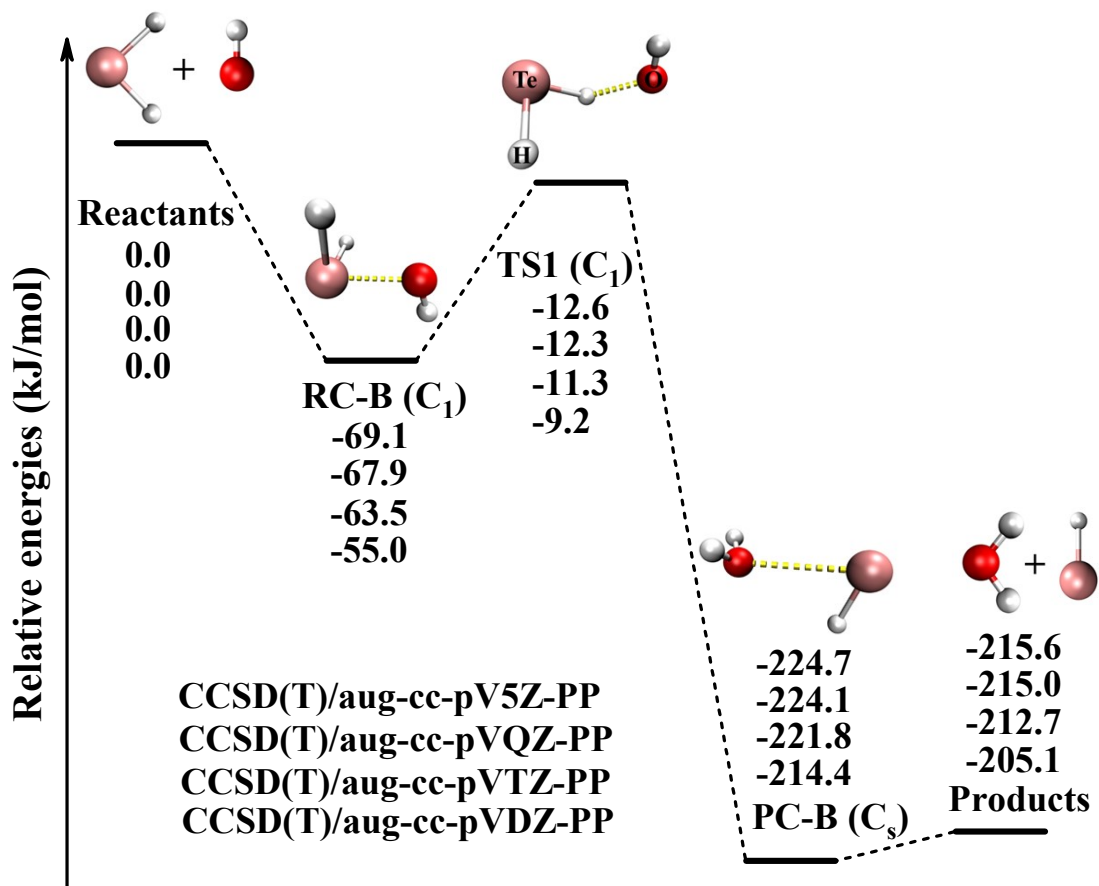

**Figure S1.** Profile of the CCSD(T) potential energy surface without zero-point vibrational energy (ZPVE) corrections for the  $\text{H}_2\text{Te} + \text{OH} \rightarrow \text{H}_2\text{O} + \text{TeH}$  reaction. The 5Z results are single-point energies at the optimized QZ geometries (in kJ/mol).

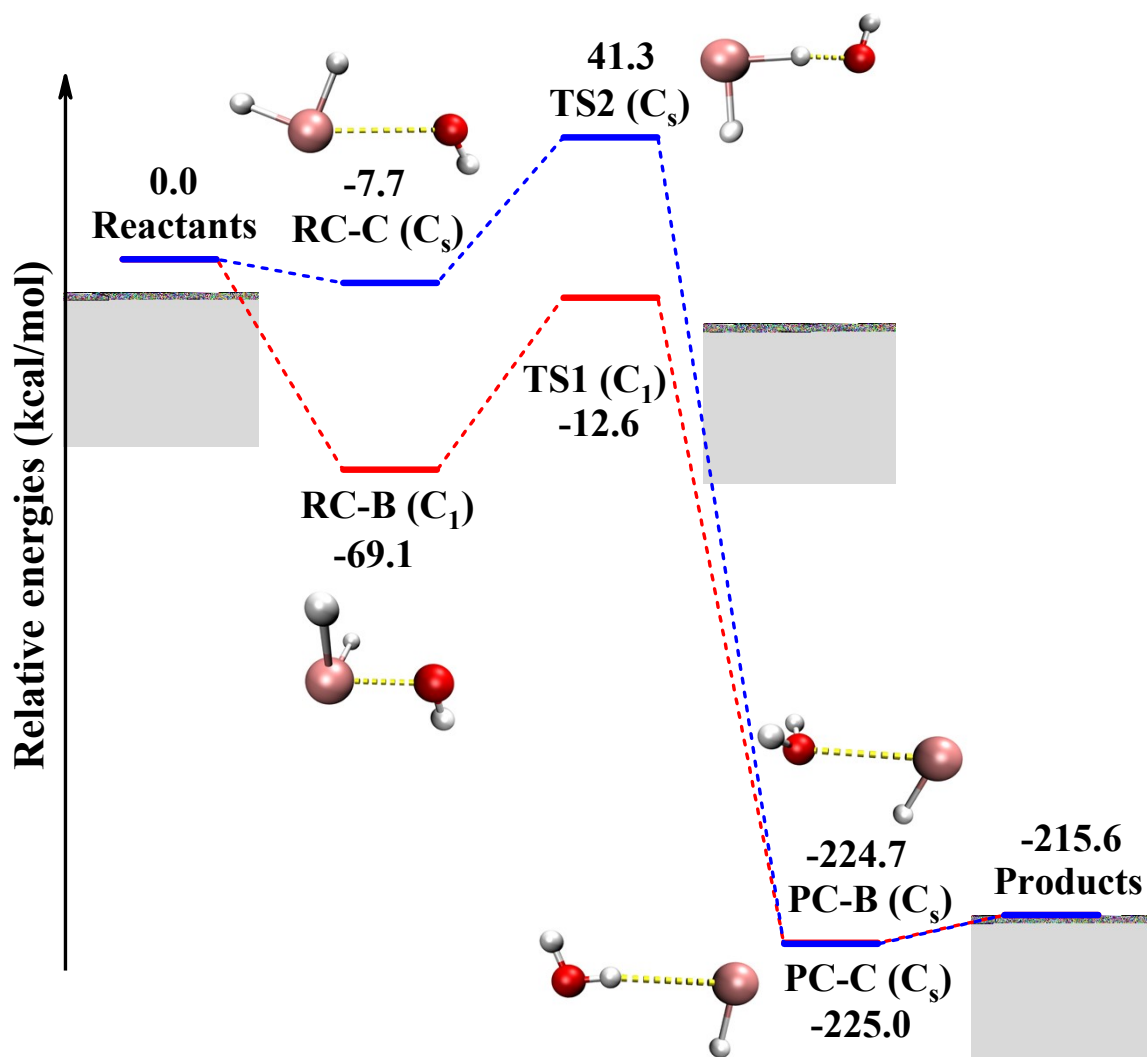

**Figure S2.** Two possible pathways without ZPVE corrections for the  $H_2Te + OH$  reaction. All energies are CCSD(T)/aug-cc-pV5Z-PP single point energies at the QZ optimized geometries (in kJ/mol).

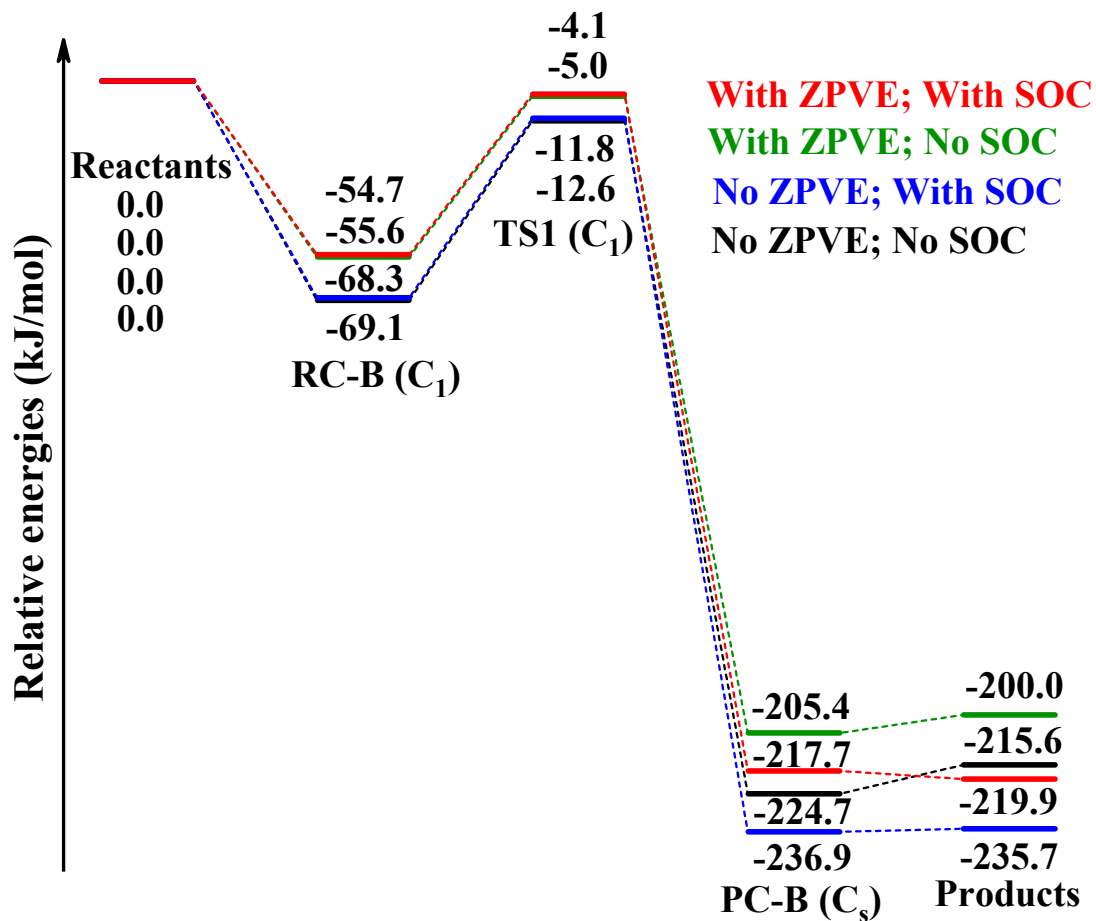

**Figure S3.** Five stationary points on the potential energy surface for the  $H_2Te + OH$  reaction. The single-point energies with 5Z at the optimized QZ geometries are corrected by ZPVE and spin-orbit coupling (SOC) effects (in kJ/mol).

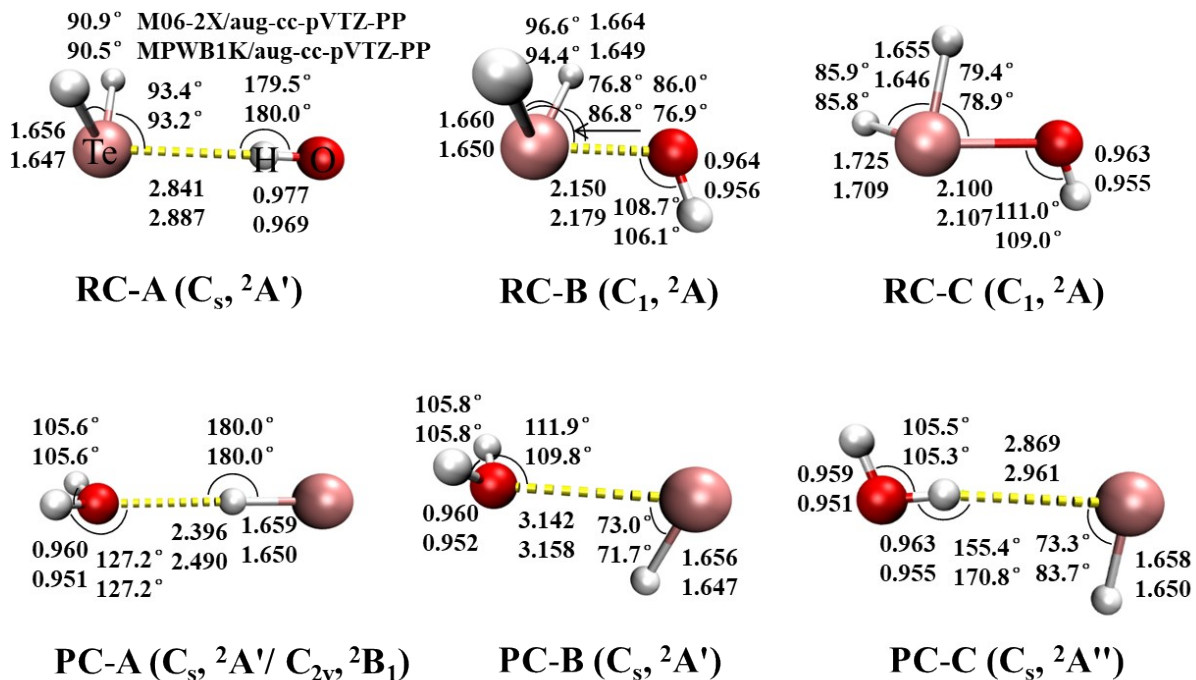

**Figure S4.** Optimized geometries of the reactant complexes and the product complexes with two DFT (M06-2X and MPWB1K) functionals. All bond distances are in Å.

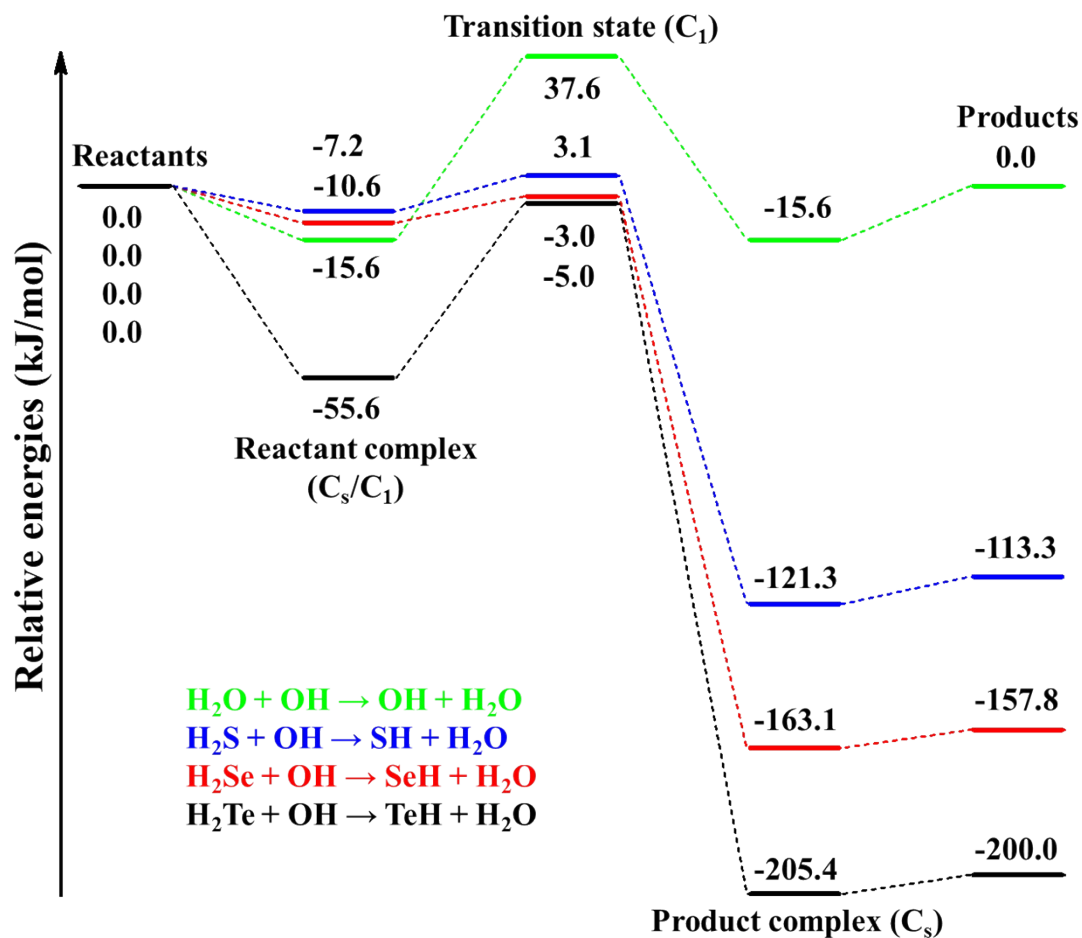

**Figure S5.** Comparison of the potential energy surface of the  $H_2Te + OH$  reaction with the  $H_2Se + OH$ ,<sup>[2]</sup>  $H_2S + OH$ ,<sup>[3]</sup> and  $H_2O + OH$ <sup>[4]</sup> reactions at the CCSD(T)/5Z level (with ZPVE corrections, in kJ/mol).

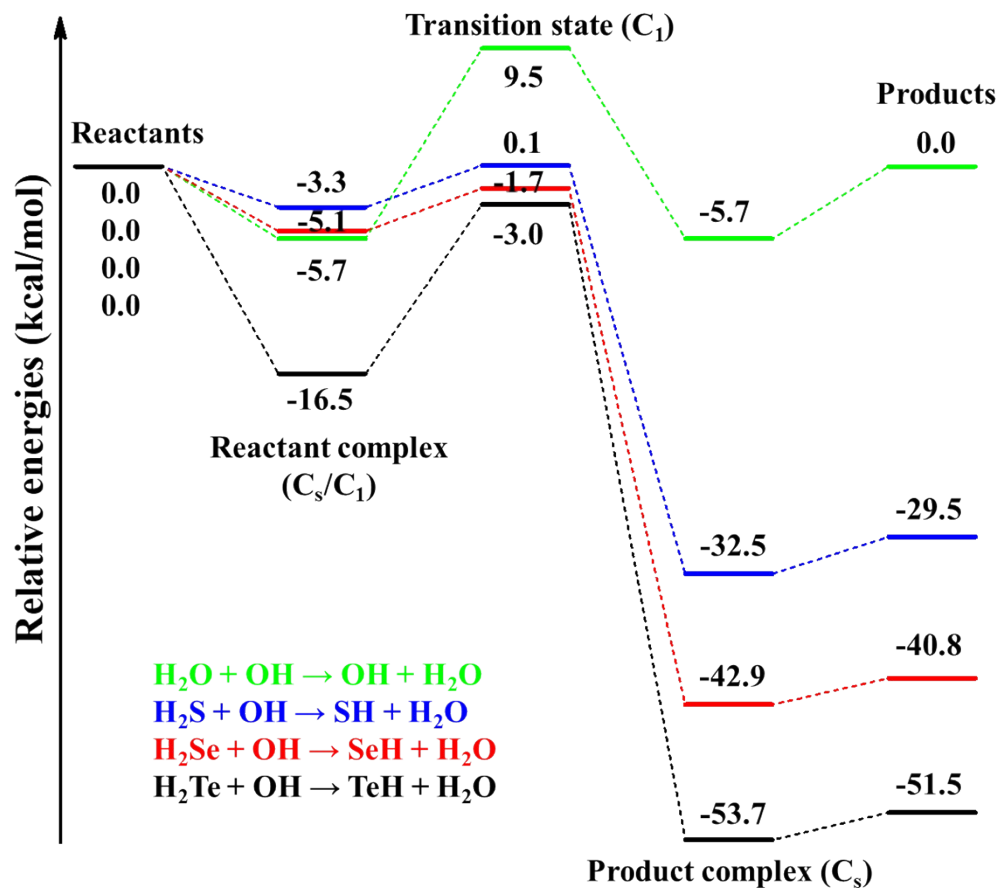

**Figure S6.** Comparison of the potential energy surface of the  $H_2Te + OH$  reaction with the  $H_2Se + OH$ ,<sup>[2]</sup>  $H_2S + OH$ ,<sup>[3]</sup> and  $H_2O + OH$ <sup>[4]</sup> reactions at the CCSD(T)/5Z level (without ZPVE corrections).



**Table S1.**  $T_1$  diagnostic values of all the stationary points for the two pathways of the  $\text{H}_2\text{Te} + \text{OH}$  reaction.

|                        | DZ    | TZ    | QZ    | 5Z    |
|------------------------|-------|-------|-------|-------|
| <b>Path I</b>          |       |       |       |       |
| <b>H<sub>2</sub>Te</b> | 0.012 | 0.012 | 0.012 | 0.012 |
| <b>OH</b>              | 0.017 | 0.014 | 0.014 | 0.013 |
| <b>RCB</b>             | 0.038 | 0.030 | 0.029 | 0.029 |
| <b>TS1</b>             | 0.072 | 0.076 | 0.080 | 0.080 |
| <b>PCB</b>             | 0.018 | 0.016 | 0.016 | 0.016 |
| <b>H<sub>2</sub>O</b>  | 0.012 | 0.010 | 0.009 | 0.009 |
| <b>HTe</b>             | 0.016 | 0.016 | 0.017 | 0.017 |
| <b>Path II</b>         |       |       |       |       |
| <b>RCC</b>             | 0.019 | 0.018 | 0.018 | 0.018 |
| <b>TS2</b>             | 0.088 | 0.082 | 0.082 | 0.081 |
| <b>PCC</b>             | 0.018 | 0.016 | 0.016 | 0.015 |

**Table S2.** Optimized geometries (Z-matrix) of the reactant (entrance) complex with the CCSD(T) method. All bond distances are in Å, and angles are in degrees.

**RC-A ( $^2A'$ )**

|                  | aug-cc-pVDZ-PP          | aug-cc-pVTZ-PP           | aug-cc-pVQZ-PP           |
|------------------|-------------------------|--------------------------|--------------------------|
| Te               | B1 = 2.907518285157851  | B1 = 2.878324742479534   | B1 = 2.888760447092040   |
| H 1 B1           | B0 = 1.000000000500963  | B0 = 0.999999999792008   | B0 = 1.000000005162766   |
| X 2 B0 1 A0      | A0 = 88.98778929909377  | A0 = 90.297652401562587  | A0 = 90.037506754074258  |
| O 2 B2 3 A2 1 D2 | B2 = 0.983422332905190  | B2 = 0.977506869827624   | B2 = 0.974827836482296   |
| H 1 B3 2 A3 3 D3 | A2 = 88.96462520667931  | A2 = 90.274488116766534  | A2 = 90.014343972123200  |
| H 1 B3 2 A3 3 D4 | D2 = 180.00000000000000 | D2 = 180.00000000000000  | D2 = 180.00000000000000  |
|                  | B3 = 1.668057898514107  | B3 = 1.665067787395388   | B3 = 1.662099172800844   |
|                  | A3 = 91.942455036980547 | A3 = 93.151135560096535  | A3 = 93.335913097661290  |
|                  | D3 = -45.15323734103882 | D3 = -45.248478624702528 | D3 = -45.347599547446336 |
|                  | D4 = 45.15323734103882  | D4 = 45.248478624702528  | D4 = 45.347599547446336  |

**RC-B ( $^2A$ )**

|                  | aug-cc-pVDZ-PP          | aug-cc-pVTZ-PP           | aug-cc-pVQZ-PP           |
|------------------|-------------------------|--------------------------|--------------------------|
| Te               | B1 = 2.663193046283743  | B1 = 2.609969650369475   | B1 = 2.594105172331048   |
| H 1 B1           | B2 = 0.974273340206135  | B2 = 0.968373254063339   | B2 = 0.965896946616579   |
| O 2 B2 1 A2      | A2 = 53.549222391564825 | A2 = 52.951908215354386  | A2 = 52.612013499299110  |
| H 1 B3 2 A3 3 D3 | B3 = 1.671794482106665  | B3 = 1.672080470886669   | B3 = 1.670197945461297   |
| H 1 B4 2 A4 3 D4 | A3 = 96.482845250503871 | A3 = 96.670416423779258  | A3 = 96.791908973484610  |
|                  | D3 = -11.70845088797694 | D3 = -15.345433604678867 | D3 = -15.780800867767507 |
|                  | B4 = 1.671085452224168  | B4 = 1.668934873320940   | B4 = 1.666255105687253   |
|                  | A4 = 94.102491654825400 | A4 = 92.268412696604585  | A4 = 92.066693547754440  |
|                  | D4 = 81.76439139054635  | D4 = 79.608640902634377  | D4 = 79.687924541657509  |

**RC-C ( $^2A''$ )**

|                  | aug-cc-pVDZ-PP          | aug-cc-pVTZ-PP           | aug-cc-pVQZ-PP           |
|------------------|-------------------------|--------------------------|--------------------------|
| Te               | B1 = 1.671780349295196  | B1 = 1.668819695311005   | B1 = 1.665931009291979   |
| H 1 B1           | B2 = 1.664754025421492  | B2 = 1.661763947633245   | B2 = 1.658917799346088   |
| H 1 B2 2 A2      | A2 = 90.365658204236723 | A2 = 90.491223463219413  | A2 = 90.627957908752421  |
| O 3 B3 1 A3 2 D3 | B3 = 3.047894876423500  | B3 = 3.016925025100853   | B3 = 3.005042320503466   |
| H 4 B4 3 A4 1 D4 | A3 = 82.529553976466801 | A3 = 82.616312384029925  | A3 = 82.750952549820795  |
|                  | D3 = 180.00000000000000 | D3 = 180.00000000000000  | D3 = 180.00000000000000  |
|                  | B4 = 0.979800105097096  | B4 = 0.973850118908600   | B4 = 0.971217107609979   |
|                  | A4 = 153.29694608790103 | A4 = 149.864069866575250 | A4 = 150.091020428084306 |
|                  | D4 = 0.000000000000000  | D4 = 0.000000000000000   | D4 = 0.000000000000000   |

**Table S3.** Optimized geometries (Z-matrix) of the transition state **TS1** ( ${}^2A$ ) and **TS2** ( ${}^2A''$ ) with the CCSD(T) method. All bond distances are in Å, and angles are in degrees.

**TS1 ( ${}^2A$ )**

|                  | aug-cc-pVDZ-PP           | aug-cc-pVTZ-PP           | aug-cc-pVQZ-PP           |
|------------------|--------------------------|--------------------------|--------------------------|
| Te               | B1 = 1.692442082750316   | B1 = 1.692201559956625   | B1 = 1.692750081424527   |
| H 1 B1           | B2 = 1.771025595432757   | B2 = 1.743486508383592   | B2 = 1.720418833841554   |
| O 2 B2 1 A2      | A2 = 104.740348053889733 | A2 = 101.051948297326135 | A2 = 99.211490093963633  |
| H 3 B3 2 A3 1 D3 | B3 = 0.978490322458297   | B3 = 0.972185738793078   | B3 = 0.969339997558806   |
| H 1 B4 2 A4 3 D4 | A3 = 106.271514842145507 | A3 = 105.698867342195953 | A3 = 105.835716423446442 |
|                  | D3 = -73.644876837823276 | D3 = -78.594456187845680 | D3 = -81.308500746895632 |
|                  | B4 = 1.665643230283776   | B4 = 1.662559146503983   | B4 = 1.659430572440181   |
|                  | A4 = 90.970868961365696  | A4 = 91.245578449706386  | A4 = 91.518737694681050  |
|                  | D4 = -71.776889029930771 | D4 = -71.405478866997782 | D4 = -71.622524691398041 |

**TS2 ( ${}^2A''$ )**

|                  | aug-cc-pVDZ-PP            | aug-cc-pVTZ-PP           | aug-cc-pVQZ-PP           |
|------------------|---------------------------|--------------------------|--------------------------|
| Te               | B1 = 1.750531502528647    | B1 = 1.748265616512917   | B1 = 1.747057997924948   |
| H 1 B1           | B0 = 0.984694529362742    | B0 = 0.999752210812668   | B0 = 0.999752415419339   |
| X 2 B0 1 A0      | A0 = 119.085369820963862  | A0 = 90.927334298277586  | A0 = 90.927334298277586  |
| O 2 B2 3 A2 1 D2 | B2 = 1.518568367021253    | B2 = 1.497998039766768   | B2 = 1.492783971802241   |
| H 4 B3 2 A3 3 D3 | A2 = 55.049552377815957   | A2 = 84.165020871545252  | A2 = 84.580113697790068  |
| H 1 B4 2 A4 3 D4 | D2 = -180.000000000000000 | D2 = 180.000000000000000 | D2 = 180.000000000000000 |
|                  | B3 = 0.980087303955954    | B3 = 0.974623687782766   | B3 = 0.972008491542424   |
|                  | A3 = 106.239222328356405  | A3 = 106.285967417189752 | A3 = 106.432174958637574 |
|                  | D3 = -180.000000000000000 | D3 = 180.000000000000000 | D3 = 180.000000000000000 |
|                  | B4 = 1.669240936244411    | B4 = 1.666447951493797   | B4 = 1.663419394308638   |
|                  | A4 = 90.169122427541879   | A4 = 90.355484962253456  | A4 = 90.664437018739278  |
|                  | D4 = 0.000000000000000    | D4 = 0.000000000000000   | D4 = 0.000000000000000   |

**Table S4.** Optimized geometries (Z-matrix) of the product (exit) complex with the CCSD(T) method. All bond distances are in Å, and angles are in degrees.

**PC-A ( $^2A'$ )**

|                   | aug-cc-pVDZ-PP          | aug-cc-pVTZ-PP           | aug-cc-pVQZ-PP           |
|-------------------|-------------------------|--------------------------|--------------------------|
| O                 | B1 = 2.424355296203071  | B1 = 2.401206266877878   | B1 = 2.401194964039922   |
| H 1 B1            | B0 = 0.999999999994735  | B0 = 0.999999995995771   | B0 = 0.999999995995771   |
| X 2 B0 1 A0       | A0 = 91.121041402958923 | A0 = 90.147062320830088  | A0 = 90.147062015950326  |
| Te 2 B2 3 A2 1 D0 | B2 = 1.672610459498500  | B2 = 1.668494143824108   | B2 = 1.665944109796990   |
| H 1 B3 2 A3 3 D3  | A2 = 90.826921407841937 | A2 = 89.852939905191775  | A2 = 89.852939600325058  |
| H 1 B3 2 A3 3 D4  | D0 = 180.0000000000000  | D0 = 180.000000000000000 | D0 = 180.000000000000000 |
|                   | B3 = 0.966664836656135  | B3 = 0.961897348134964   | B3 = 0.959265308334056   |
|                   | A3 = 123.72793043673959 | A3 = 127.777554411414997 | A3 = 127.692431280150018 |
|                   | D3 = -71.51373394703765 | D3 = -90.000018749797690 | D3 = -90.000018141764500 |
|                   | D4 = 71.513733947037650 | D4 = 90.000018749797690  | D4 = 90.000018141764500  |

**PC-B ( $^2A'$ )**

|                  | aug-cc-pVDZ-PP          | aug-cc-pVTZ-PP           | aug-cc-pVQZ-PP           |
|------------------|-------------------------|--------------------------|--------------------------|
| O                | B1 = 3.084482609427815  | B1 = 3.035088586716309   | B1 = 3.038491006053379   |
| H 1 B1           | B2 = 1.669889601669886  | B2 = 1.666048792447216   | B2 = 1.662937211500458   |
| TE 2 B2 1 A2     | A2 = 80.958489902882718 | A2 = 81.066414326108116  | A2 = 80.749725200257757  |
| H 1 B3 2 A3 3 D3 | B3 = 0.967036001268096  | B3 = 0.962305656596687   | B3 = 0.959695507845784   |
| H 1 B3 2 A3 3 D4 | A3 = 127.0942480019109  | A3 = 126.414124984259786 | A3 = 126.307190733057212 |
|                  | D3 = -81.80919600773232 | D3 = -79.363044177934071 | D3 = -79.338624330602599 |
|                  | D4 = 81.80919600773232  | D4 = 79.363044177934071  | D4 = 79.338624330602599  |

**PC-C ( $^2A''$ )**

|                   | aug-cc-pVDZ-PP          | aug-cc-pVTZ-PP           | aug-cc-pVQZ-PP           |
|-------------------|-------------------------|--------------------------|--------------------------|
| O                 | B1 = 0.966395462967040  | B1 = 0.961574230426386   | B1 = 0.958932075168831   |
| H 1 B1            | B2 = 0.970330353426447  | B2 = 0.965358654082432   | B2 = 0.962539763415902   |
| H 1 B2 2 A2       | A2 = 103.96785995437518 | A2 = 104.216471654816885 | A2 = 104.409447510028016 |
| Te 3 B3 1 A3 2 D3 | B3 = 2.879778490052568  | B3 = 2.894573369050788   | B3 = 2.921601978905676   |
| H 4 B4 3 A4 1 D4  | A3 = 166.44837713582367 | A3 = 167.957610879259249 | A3 = 166.994692968458054 |
|                   | D3 = 180.0000000000000  | D3 = 180.000000000000000 | D3 = 180.000000000000000 |
|                   | B4 = 1.672613622594432  | B4 = 1.668862486688320   | B4 = 1.665626078115529   |
|                   | A4 = 81.77196151055950  | A4 = 81.873250998601591  | A4 = 82.060203991158900  |
|                   | D4 = 0.000000000000000  | D4 = 0.000000000000000   | D4 = 0.000000000000000   |

**Table S5.** Harmonic vibrational frequencies  $\omega$  ( $\text{cm}^{-1}$ ) and infrared intensities ( $\text{km/mol}$ , in parentheses) for the stationary points of the  $\text{H}_2\text{Te} + \text{OH}$  reaction from the CCSD(T) method with the aug-cc-pVnZ-PP ( $n = \text{D, T, Q}$ ) basis sets.

| Vibrational Frequencies $\omega$ (Infrared Intensity) |          |          |          |                            |         |          |          |         |          |
|-------------------------------------------------------|----------|----------|----------|----------------------------|---------|----------|----------|---------|----------|
| CCSD(T)/aug-cc-pVDZ-PP                                |          |          |          |                            |         |          |          |         |          |
| $\text{H}_2\text{Te} + \text{OH}$                     | 2141(46) | 2132(39) | 901(16)  | ( $\text{H}_2\text{Te}$ ); |         | 3684(7)  | (OH)     |         |          |
| <b>RC-B</b>                                           | 3722(15) | 2115(35) | 2084(28) | 863(42)                    | 835(13) | 601(4)   | 325(32)  | 308(27) | 156(29)  |
| <b>TS1</b>                                            | 3688(49) | 2145(25) | 1947(19) | 889(7)                     | 637(32) | 315(16)  | 268(53)  | 77(16)  | 707i(2)  |
| <b>PC-B</b>                                           | 3898(56) | 3779(7)  | 2121(46) | 1634(69)                   | 184(3)  | 129(0)   | 119(202) | 69(6)   | 65(43)   |
| $\text{H}_2\text{O} + \text{TeH}$                     | 3905(46) | 3787(2)  | 1638(65) | ( $\text{H}_2\text{O}$ );  |         | 2110(49) | (TeH)    |         |          |
| CCSD(T)/aug-cc-pVTZ-PP                                |          |          |          |                            |         |          |          |         |          |
| $\text{H}_2\text{Te} + \text{OH}$                     | 2145(39) | 2137(34) | 887(14)  | ( $\text{H}_2\text{Te}$ ); |         | 3718(10) | (OH)     |         |          |
| <b>RC-B</b>                                           | 3754(18) | 2112(33) | 2068(29) | 882(56)                    | 814(10) | 624(5)   | 356(21)  | 331(28) | 190(51)  |
| <b>TS1</b>                                            | 3724(58) | 2151(21) | 1954(4)  | 872(5)                     | 663(25) | 349(16)  | 292(53)  | 107(12) | 802i(12) |
| <b>PC-B</b>                                           | 3912(63) | 3802(10) | 2132(38) | 1642(73)                   | 201(3)  | 127(1)   | 122(207) | 73(5)   | 71(40)   |
| $\text{H}_2\text{O} + \text{TeH}$                     | 3920(54) | 3811(3)  | 1646(70) | ( $\text{H}_2\text{O}$ );  |         | 2120(41) | (TeH)    |         |          |
| CCSD(T)/aug-cc-pVQZ-PP                                |          |          |          |                            |         |          |          |         |          |
| $\text{H}_2\text{Te} + \text{OH}$                     | 2153(36) | 2146(31) | 885(14)  | ( $\text{H}_2\text{Te}$ ); |         | 3739(11) | (OH)     |         |          |
| <b>RC-B</b>                                           | 3772(20) | 2118(32) | 2070(29) | 889(60)                    | 810(10) | 633(6)   | 366(20)  | 340(30) | 199(54)  |
| <b>TS1</b>                                            | 3744(62) | 2160(18) | 1951(1)  | 870(5)                     | 678(22) | 370(15)  | 308(53)  | 130(8)  | 866i(31) |
| <b>PC-B</b>                                           | 3932(66) | 3821(11) | 2142(36) | 1646(74)                   | 202(2)  | 125(1)   | 121(210) | 72(6)   | 70(41)   |
| $\text{H}_2\text{O} + \text{TeH}$                     | 3941(58) | 3831(4)  | 1650(72) | ( $\text{H}_2\text{O}$ );  |         | 2130(38) | (TeH)    |         |          |

**Table S6.** Relative energies (kcal/mol) of the stationary points for the H<sub>2</sub>Te + OH reaction predicted by 28 DFT methods with the aug-cc-pVTZ-PP basis sets without ZPVE corrections. The most reliable CCSD(T)/5Z results are reported on the last line for comparison.

| Methods    | H <sub>2</sub> Te+OH | RC-B  | TS1   | Barrier of    |       | H <sub>2</sub> O+HTe | HF%             | Ref   |
|------------|----------------------|-------|-------|---------------|-------|----------------------|-----------------|-------|
|            |                      |       |       | TS1 from RC-B | PC-B  |                      |                 |       |
| BH&HLYP    | 0.0                  | -7.2  | -0.7  | 6.4           | -48.2 | -46.7                | 50              | 38    |
| MPW1K      | 0.0                  | -10.7 | -1.5  | 9.1           | -49.4 | -47.9                | 42.8            | 24    |
| MPWKCIS1K  | 0.0                  | -11.5 | -2.1  | 9.4           | -51.5 | -50.0                | 41              | 39    |
| BB1K       | 0.0                  | -12.5 | -2.5  | 10.1          | -50.6 | -49.2                | 42              | 40    |
| MPWB1K     | 0.0                  | -13.0 | -2.9  | 10.2          | -51.2 | -49.3                | 44              | 41    |
| M05-2X     | 0.0                  | -14.7 | -3.5  | 11.3          | -59.0 | -55.9                | 56              | 42    |
| M06-2X     | 0.0                  | -16.4 | -3.3  | 13.1          | -61.6 | -58.4                | 54              | 43    |
| BMK        | 0.0                  | -16.0 | -4.3  | 11.7          | -53.4 | -51.7                | 42              | 44    |
| ωB97-X     | 0.0                  | -15.4 | -4.2  | 11.2          | -53.0 | -49.4                | LC <sup>a</sup> | 45    |
| ωB97       | 0.0                  | -15.3 | -3.9  | 11.4          | -52.8 | -48.8                | LC <sup>a</sup> | 45    |
| CAM-B3LYP  | 0.0                  | -15.2 | -4.8  | 10.4          | -52.4 | -50.5                | 19-65           | 46    |
| ωB97-XD    | 0.0                  | -15.2 | -4.9  | 10.4          | -52.3 | -49.6                | LC <sup>a</sup> | 47    |
| mPW1PW91   | 0.0                  | -18.7 | -6.0  | 12.6          | -50.8 | -49.2                | 25              | 48,49 |
| M05        | 0.0                  | -20.1 | -6.9  | 13.2          | -52.9 | -50.0                | 28              | 50    |
| PBE0       | 0.0                  | -19.9 | -7.1  | 12.7          | -51.6 | -49.5                | 25              | 51-53 |
| B3PW91     | 0.0                  | -19.6 | -7.2  | 12.4          | -50.9 | -49.8                | 20              | 49,54 |
| B3LYP      | 0.0                  | -19.2 | -7.3  | 11.9          | -51.0 | -49.5                | 20              | 54    |
| HSEh1PBE   | 0.0                  | -19.8 | -7.4  | 12.4          | -51.1 | -48.8                | 25              | 55-61 |
| B98        | 0.0                  | -20.1 | -7.7  | 12.3          | -52.5 | -50.2                | 21.98           | 62    |
| MPW3LYP    | 0.0                  | -19.9 | -7.9  | 12.0          | -51.7 | -49.5                | 21.8            | 41,48 |
| TPSSh      | 0.0                  | -21.1 | -8.4  | 12.7          | -47.5 | -45.5                | 10              | 63    |
| M06        | 0.0                  | -20.9 | -8.4  | 12.5          | -53.3 | -49.7                | 27              | 43    |
| TPSS1KCIS  | 0.0                  | -21.2 | -8.6  | 12.6          | -49.5 | -47.6                | 13              | 64    |
| MPW1KCIS   | 0.0                  | -22.3 | -10.6 | 11.7          | -53.5 | -51.8                | 15              | 39    |
| M06-L      | 0.0                  | -23.3 | -10.6 | 12.7          | -49.5 | -46.1                | 0               | 65    |
| VSXC       | 0.0                  | -22.7 | -13.1 | 9.7           | -55.6 | -49.8                | 0               | 66    |
| BLYP       | 0.0                  | -25.1 | -14.2 | 10.9          | -51.7 | -50.1                | 0               | 67,68 |
| BP86       | 0.0                  | -27.3 | -16.0 | 11.3          | -53.1 | -51.0                | 0               | 68,69 |
| CCSD(T)/5Z | 0.0                  | -16.5 | -3.0  | 13.5          | -53.7 | -51.5                | —               | —     |

<sup>a</sup>For the LC methods, the percentage of H-F component varies with the long-range corrections.

**Table S7.** Predicted geometries for **TS1** by 28 DFT functionals with the aug-cc-pVTZ-PP basis sets. Distances are in Angstrom, and angles are in degrees.

| Methods    | R(H-Te) | R(Te··H) | R(H··O) | R(O-H) | ∠H-Te··H | ∠Te··H··O | ∠H··O-H | D(H-Te-H-O) | D(Te-H-O-H) |
|------------|---------|----------|---------|--------|----------|-----------|---------|-------------|-------------|
| BH&HLYP    | 1.6492  | 1.6774   | 1.7097  | 0.9617 | 91.2     | 143.9     | 101.6   | -85.5       | -2.8        |
| MPW1K      | 1.6479  | 1.6650   | 1.8201  | 0.9623 | 91.0     | 123.8     | 105.7   | -81.3       | -17.8       |
| MPWKCIS1K  | 1.6496  | 1.6689   | 1.8086  | 0.9616 | 91.3     | 112.8     | 108.5   | -73.5       | -52.5       |
| BB1K       | 1.6453  | 1.6733   | 1.7351  | 0.9615 | 91.1     | 108.6     | 106.8   | -70.9       | -66.2       |
| MPWB1K     | 1.6443  | 1.6715   | 1.7381  | 0.9610 | 91.1     | 110.3     | 106.9   | -70.6       | -61.8       |
| M06-2X     | 1.6558  | 1.6793   | 1.7807  | 0.9717 | 90.9     | 127.6     | 104.1   | -79.9       | -13.8       |
| M05-2X     | 1.6520  | 1.6715   | 1.8302  | 0.9696 | 91.1     | 121.7     | 104.7   | -74.3       | -26.4       |
| ωB97       | 1.6493  | 1.6670   | 1.8180  | 0.9721 | 91.3     | 123.7     | 104.7   | -79.5       | -19.4       |
| ωB97X      | 1.6509  | 1.6787   | 1.7404  | 0.9677 | 91.7     | 106.3     | 107.3   | -71.6       | -71.0       |
| BMK        | 1.6564  | 1.6887   | 1.7165  | 0.9662 | 91.5     | 102.0     | 107.6   | -72.2       | -80.6       |
| CAM-B3LYP  | 1.6513  | 1.6776   | 1.7440  | 0.9687 | 91.7     | 102.7     | 108.1   | -72.5       | -77.3       |
| ωB97XD     | 1.6539  | 1.6836   | 1.7330  | 0.9662 | 91.6     | 102.6     | 107.3   | -72.2       | -79.1       |
| mPW1PW91   | 1.6546  | 1.6820   | 1.7540  | 0.9663 | 91.4     | 99.9      | 106.9   | -72.8       | -81.1       |
| M05        | 1.6696  | 1.7123   | 1.6674  | 0.9644 | 91.6     | 101.9     | 106.4   | -71.4       | -88.0       |
| PBE0       | 1.6560  | 1.6842   | 1.7505  | 0.9672 | 91.4     | 98.8      | 106.9   | -72.7       | -82.2       |
| B3PW91     | 1.6576  | 1.6858   | 1.7596  | 0.9684 | 91.4     | 98.7      | 106.7   | -73.3       | -83.5       |
| B3LYP      | 1.6612  | 1.6885   | 1.7660  | 0.9701 | 91.3     | 102.2     | 107.1   | -73.3       | -82.2       |
| HSEh1PBE   | 1.6579  | 1.6862   | 1.7533  | 0.9672 | 91.4     | 99.6      | 106.9   | -72.7       | -81.7       |
| B98        | 1.6577  | 1.6846   | 1.7648  | 0.9684 | 91.4     | 100.9     | 107.0   | -73.0       | -82.0       |
| MPW3LYP    | 1.6603  | 1.6878   | 1.7607  | 0.9696 | 91.4     | 102.2     | 107.4   | -72.9       | -81.8       |
| TPSSh      | 1.6577  | 1.6902   | 1.7436  | 0.9728 | 91.0     | 99.8      | 105.2   | -72.1       | -85.1       |
| M06        | 1.6657  | 1.7071   | 1.6628  | 0.9662 | 90.7     | 104.4     | 105.8   | -70.2       | -84.6       |
| TPSS1KCIS  | 1.6581  | 1.6907   | 1.7436  | 0.9708 | 91.1     | 99.8      | 105.9   | -72.5       | -85.3       |
| MPW1KCIS   | 1.6632  | 1.6925   | 1.7766  | 0.9702 | 91.3     | 96.5      | 107.0   | -73.8       | -86.2       |
| M06-L      | 1.6622  | 1.7093   | 1.6686  | 0.9670 | 90.1     | 106.0     | 104.0   | -70.6       | -87.8       |
| VSXC       | 1.6603  | 1.7040   | 1.7338  | 0.9682 | 89.0     | 103.3     | 103.8   | -66.6       | -88.4       |
| BLYP       | 1.6759  | 1.7051   | 1.8199  | 0.9801 | 91.0     | 97.6      | 106.3   | -74.1       | -88.8       |
| BP86       | 1.6715  | 1.7016   | 1.8097  | 0.9795 | 91.1     | 93.7      | 106.0   | -73.7       | -89.1       |
| CCSD(T)/QZ | 1.6594  | 1.6928   | 1.7204  | 0.9693 | 91.5     | 99.2      | 105.8   | -71.6       | -81.3       |

**Table S8.** Barrier heights (in kcal/mol) using the CCSD(T)/aug-cc-pVQZ-PP single-point energies at the geometries predicted by 28 DFT functionals with the aug-cc-pVTZ-PP basis sets.

| Methods for geometry optimization | Barrier height | Barrier of <b>TS1</b> from <b>RC-B</b> |
|-----------------------------------|----------------|----------------------------------------|
| BH&HLYP                           | -2.31          | 13.35                                  |
| MPW1K                             | -2.42          | 13.67                                  |
| MPWK CIS1K                        | -2.57          | 13.42                                  |
| BB1K                              | -2.78          | 13.30                                  |
| MPWB1K                            | -2.74          | 13.37                                  |
| M06-2X                            | -2.45          | 13.72                                  |
| M05-2X                            | -2.46          | 13.69                                  |
| $\omega$ B97                      | -2.45          | 13.40                                  |
| $\omega$ B97X                     | -2.82          | 13.08                                  |
| BMK                               | -2.89          | 13.11                                  |
| CAM-B3LYP                         | -2.86          | 13.04                                  |
| $\omega$ B97XD                    | -2.86          | 12.95                                  |
| mPW1PW91                          | -2.92          | 15.64                                  |
| M05                               | -2.95          | 13.21                                  |
| PBE0                              | -2.95          | 15.64                                  |
| B3PW91                            | -2.94          | 15.53                                  |
| B3LYP                             | -2.77          | 15.34                                  |
| HSEh1PBE                          | -2.92          | 15.60                                  |
| B98                               | -2.86          | 15.50                                  |
| MPW3LYP                           | -2.79          | 15.40                                  |
| TPSSh                             | -2.92          | 15.51                                  |
| M06                               | -3.07          | 13.06                                  |
| TPSS1KCIS                         | -2.89          | 15.50                                  |
| MPW1KCIS                          | -2.99          | 15.29                                  |
| M06-L                             | -2.99          | 15.07                                  |
| VSXC                              | -2.65          | 14.89                                  |
| BLYP                              | -2.82          | 14.46                                  |
| BP86                              | -3.16          | 14.84                                  |
| CCSD(T)/5Z                        | -3.01          | 13.52                                  |
